# Supplementary material for: Unpacking the black box of the effectiveness of task forces in maternal and neonatal health in Morocco : A realist evaluation protocol&nbsp;
Source: Research Square preprint supplement (doi:10.21203/rs.3.rs-280390/v1), 2021-03-04
Supplement: Supplementary file 1 [file 144714621e6b6089027d0b69.docx]

# Supplementary file 3

Table 1 Functions and a subfunctions of a regional MNH taskforce

| **TSF functions** | **Sub functions (conditions)** | **Abreviation** |
| --- | --- | --- |
| **Interorganisational Coordination** | Regularity of meetings | ReP |
| Involvement of clinicians | Cli |
| Involvement of managers | Ges |
| **Support to strategic management** | Situational analysis | AnS |
| Regional strategic planning processes | PSR |
| Operational planning | OpP |
| **Support to MNH programme implementation** | Support to problem resolution at operational level | ResProb |
| Budgetary resource mobilisation | MRBg |
| Extra budgetary resource mobilisation | MRAd |
| Contract of objectives and means | COM |
| **Monitoring** | Developing MNH key performance indicators | TBP |
| Periodicity of the monitoring | Ryth M |
| Monitoring the implementation of recommendations | Suivi-Rec |
| **Engaging partners** | Simple invitation | Inv |
| Occasional participation | Occ |
| Active engagement of partners | Eng |
| Formalised partnership | ForP |
|  | Community mobilisation | MobSoc |
